# Supplementary material for: Crosstalk between Depression and Dementia with Resting-State fMRI Studies and Its Relationship with Cognitive Functioning
Source: MDPI journal article supplement (doi:10.3390/biomedicines9010082), 2021-01-16
Supplement: s1 [file s1]

# Crosstalk between Depression and Dementia with Resting-State fMRI Studies and Its Relationship with Cognitive Functioning

Junhyung Kim and Yong-Ku Kim

(Supplementary Information)

**Supplementary Table S1.** Characteristics of main rs-fMRI studies associated with the default mode network (DMN) in late-life depression (LLD) patients included in the review.

| References | Experimental Details |               |                    |  |            |         |                 |                 |
|------------|----------------------|---------------|--------------------|--|------------|---------|-----------------|-----------------|
|            | LLD                  |               | Healthy Control    |  | Study Type | Scanner | Reference Space | Analysis Method |
|            | Sample Size (Male)   | Age Mean (SD) | Sample Size (Male) |  |            |         |                 |                 |
| [92]       | 32(11)               | 67.2(5.8)     | 39(19)             |  | CS         | 3.0T S  | MNI             | SB              |
| [94]       | 18(8)                | 67.2(7.3)     | 14(7)              |  | CS         | 1.5T GE | TAL             | ReHo            |
| [95]       | 15(6)                | 67.5(6.1)     | 15(6)              |  | CS         | 1.5T GE | MNI             | ReHo            |
| [96]       | 52(14)               | 71.4(7.6)     | 36(9)              |  | CS         | 3.0T S  | MNI             | ALFF            |
| [100]      | 12(5)                | 70.5(4.9)     | 8(3)               |  | CS         | 1.5T GE | MNI             | SB              |
| [101]      | 47(13)               | 68.7(6.9)     | 46(13)             |  | Cohort     | 3.0T S  | Colin27         | SB              |

Abbreviations: ALFF, Amplitude of low-frequency fluctuation; CS, cross-sectional study; GE, General Electronics; MNI, Montreal Neurological Institute; ReHo, Regional homogeneity; S, Siemens; SB, seed-based analysis; SD, standard deviation; T, tesla; TAL, Talairach.

**Supplementary Table S2.** Characteristics of main rs-fMRI studies associated with the default mode network (DMN) in Alzheimer's disease (AD) and mild cognitive impairment (MCI) patients included in the review.

| References | Experimental Details |               |                    |               |                    |  |            |         |                 |                 |
|------------|----------------------|---------------|--------------------|---------------|--------------------|--|------------|---------|-----------------|-----------------|
|            | AD                   |               | MCI                |               | Healthy Control    |  | Study Type | Scanner | Reference Space | Analysis Method |
|            | Sample Size (Male)   | Age Mean (SD) | Sample Size (Male) | Age Mean (SD) | Sample Size (Male) |  |            |         |                 |                 |
| [112]      | 13(5)                | 70.1(6.7)     | N/A                | N/A           | 8(3)               |  | CS         | 1.5T S  | TAL             | SB              |
| [118]      | 13(8)                | 74.5(9.7)     | 12(6)              | 69.1(7.4)     | 13(5)              |  | CS         | 1.5T S  | MNI             | ICA             |
| [123]      | 23(7)                | 73(9)         | 19(10)             | 76(8)         | 21(12)             |  | CS         | 3.0T GE | MNI             | ReHo            |
| [126]      | 39(23)               | 67(8)         | 23(15)             | 71(8)         | 43(22)             |  | CS         | 1.5T S  | MNI             | ICA             |
| [128]      | 21(9)                | 64.2(8.7)     | N/A                | N/A           | 18(12)             |  | Cohort     | 3.0T GE | MNI             | ICA             |
| [131]      | 11(7)                | 71.9(7.9)     | 10(6)              | 71.2(4.1)     | 10(7)              |  | CS         | 3.0T S  | MNI             | ICA             |
| [134]      | 24(14)               | 68.2(8.4)     | N/A                | N/A           | 16(7)              |  | CS         | 3.0T P  | MNI             | ICA             |
| [135]      | 28(18)               | 78(4)         | N/A                | N/A           | 56(36)             |  | CS         | 3.0T GE | MNI             | ICA/SB          |
| [141]      | 18(9)                | 70.7(7.2)     | N/A                | N/A           | 21(8)              |  | CS         | 1.5T S  | MNI             | Graph           |
| [142]      | N/A                  | N/A           | 37(17)             | 66.8(9.4)     | 47(20)             |  | CS         | 3.0T S  | MNI             | Graph           |
| [143]      | 33(13)               | 66.2(9.6)     | N/A                | N/A           | 20(10)             |  | CS         | 1.5T M  | MNI             | Graph           |
| [158]      | 16(6)                | 71.6(5.1)     | N/A                | N/A           | 16(7)              |  | CS         | 1.5T P  | MNI             | SB              |
| [160]      | N/A                  | N/A           | 30(15)             | 72.5(4.4)     | 26(12)             |  | CS         | 1.5T GE | MNI             | SB              |

Abbreviations: AD, Alzheimer's disease; CS, cross-sectional study; GE, General Electronics; Graph, Graph analysis; ICA, Independent Component Analysis; M, Marconi; MCI, Mild cognitive impairment; MNI, Montreal Neurological Institute; P, Philips; ReHo, Regional homogeneity; S, Siemens; SB, seed-based analysis; SD, standard deviation; T, tesla; TAL, Talairach.

**Supplementary Table S3.** Characteristics of main rs-fMRI studies associated with the default mode network (DMN) in Alzheimer’s disease (AD) and mild cognitive impairment (MCI) patients included in the review (Continued).

| References | Demographic Group: Sample Size, N (Male); Age, Mean (SD)                                                                                                                                                                                                                                           | Study Type | Scanner | Reference Space | Analysis Method |
|------------|----------------------------------------------------------------------------------------------------------------------------------------------------------------------------------------------------------------------------------------------------------------------------------------------------|------------|---------|-----------------|-----------------|
| [127]      | Sample size: 570(268)<br>CDR 0: 386; CDR 0.5: 91; CDR 1: 33                                                                                                                                                                                                                                        | CS         | 3.0T S  | MNI             | SB              |
| [138]      | CDR 1: Sample size, 31(13); age, 70.7(11.4)<br>CDR 0.5: Sample size, 90(36); age, 74.5(7.5)<br>CDR 0: Sample size, 205(66); age, 66.4(9.8)                                                                                                                                                         | CS         | 3.0T S  | MNI             | Graph           |
| [146]      | CDR 0M-: Sample size, 37(17); age, 38.9(9.7)<br>CDR 0M+: Sample size, 44(17); age, 34.6(8.0)<br>CDR 0.5M+: Sample size, 24(8); age, 44.5(11.7)<br>AD, CDR 1-2M+: Sample size, 15(6); age, 49.3(9.7)<br>CDR 0M-: Sample size, 25(10); age, 30.9(10)<br>CDR 0M+: Sample size, 31(12); age, 33.9(8.5) | CS         | 3.0T S  | MNI             | ICA             |
| [149]      | ADAD<br>CDR 0 M+: Sample size, 15(5); age, 41.4(10.4)<br>CDR 0.5 M+: Sample size, 8(5); age, 49.4(8.7)<br>CDR 0: Sample size, 343(117); age, 68.7(9.5)                                                                                                                                             | CS         | 3.0T S  | MNI             | SB              |
| [152]      | LOAD<br>CDR 0.5: Sample size, 74(38); age, 74.0(7.7)<br>CDR 1: Sample size, 27 10); age, 70.1(11.4)<br>Apo ε4 -: Sample size, 62(19); age, 63.3(7.4)<br>Apo ε4 +: Sample size, 38(9); age, 58.8(8.5)                                                                                               | CS         | 3.0T S  | TAL             | SB              |
| [154]      | Apo ε4 -: Sample size, 18(10); age, 28.6(3.9)<br>Apo ε4 +: Sample size, 18(7); age, 28.4(4.9)                                                                                                                                                                                                      | CS         | 3.0T S  | HOB             | ICA             |
| [157]      | Apo ε4 -: Sample size, 62(21); age, 64.4(7.0)<br>Apo ε4 +: Sample size, 33(13); age, 62.6(7.6)                                                                                                                                                                                                     | CS         | 1.5T GE | MNI             | ICA             |
| [163]      | mild AD: Sample size, 12(8); age, 77.6(7.1) compare baseline and after treatment                                                                                                                                                                                                                   | Cohort     | 3.0T GE | TAL             | SB              |

Abbreviations: AD, Alzheimer’s disease; ADAD, autosomal dominant Alzheimer’s disease; Apo, apolipoprotein; CDR, Clinical Dementia Rating Scale; CS, cross-sectional study; GE, General Electronics; Graph, Graph analysis; HOB, Harvard-Oxford brain; ICA, Independent Component Analysis; LOAD, late-onset Alzheimer’s disease; M-, mutation negative; M+, mutation positive; MCI, Mild cognitive impairment; MNI, Montreal Neurological Institute; S, Siemens; SB, seed-based analysis; SD, standard deviation; T, tesla; TAL, Talairach.

**Supplementary Table S4.** Characteristics of main rs-fMRI studies associated with the executive control network (ECN) in late-life depression (LLD) patients included in the review.

| References | Experimental Details |               |                    |  |            |         |                 |                 |
|------------|----------------------|---------------|--------------------|--|------------|---------|-----------------|-----------------|
|            | LLD                  |               | Healthy Control    |  | Study Type | Scanner | Reference Space | Analysis Method |
|            | Sample Size (Male)   | Age Mean (SD) | Sample Size (Male) |  |            |         |                 |                 |
| [186]      | 11(1)                | 64.9(4.5)     | 18(7)              |  | CS         | 3.0T GE | MNI             | SB              |
| [188]      | 22(7)                | 67.6(5.5)     | 22(9)              |  | CS         | 3.0T GE | MNI             | ReHo            |
| [189]      | 14(7)                | 67.6(4.0)     | 18(1)              |  | Cohort     | 1.5T GE | MNI             | SB              |
| [192]      | 79(52)               | 66.3(5.9)     | 21(9)              |  | CS         | 3.0T P  | MNI             | SB              |

Abbreviations: CS, cross-sectional study; GE, General Electronics; MNI, Montreal Neurological Institute; ReHo, Regional homogeneity; SB, seed-based analysis; SD, standard deviation; T, tesla.

**Supplementary Table S5.** Characteristics of main rs-fMRI studies associated with the executive control network (ECN) in Alzheimer’s disease (AD) and mild cognitive impairment (MCI) patients included in the review.

| References | Demographic Group: Sample Size, N (Male); Age, Mean (SD)                                                                                                                         | Study Type | Scanner | Reference Space | Analysis Method |
|------------|----------------------------------------------------------------------------------------------------------------------------------------------------------------------------------|------------|---------|-----------------|-----------------|
| [181]      | MCI-R: Sample size, 13(6); age, 69.8(6.0);<br>MCI-S: Sample size, 33(17); age, 71.0(6.4)<br>MCI-P: Sample size, 19(9); age, 71.1(7.2)<br>HC: Sample size, 36(18); age, 70.8(1.1) | Cohort     | 3.0T P  | MNI             | ICA             |
| [197]      | AD: Sample size, 14(5); age, 70.4(5.6)<br>MCI: Sample size, 12(4); age, 73.6(6.2)<br>HC: Sample size, 16(4); age, 69(5.1)                                                        | CS         | 1.5T P  | MNI             | ICA             |
| [198]      | mild AD/MCI: Sample size, 13(9); age, 72(9)<br>HC: Sample size, 12(7); age, 72(7)                                                                                                | CS         | 1.5T S  | MNI             | ICA             |

Abbreviations: AD, Alzheimer’s disease; CS, cross-sectional study; ICA, Independent Component Analysis; MCI, Mild cognitive impairment; MCI-R, MCI patients reversed to normal states and stabilized to a normal condition for 24 months; MCI-S, MCI patients stabilized in the MCI condition for 24 months; MCI-P, MCI patients progressed to AD and stabilized in the AD condition for 24 months; MNI, Montreal Neurological Institute; P, Philips; S, Siemens; T, tesla.

**Supplementary Table S6.** Characteristics of main rs-fMRI studies associated with the salience network (SN) in late-life depression (LLD) patients included in the review.

| References | Experimental Details |                                                                                    |                    |  |            |         |                 |                 |
|------------|----------------------|------------------------------------------------------------------------------------|--------------------|--|------------|---------|-----------------|-----------------|
|            | LLD                  |                                                                                    | Healthy Control    |  | Study Type | Scanner | Reference Space | Analysis Method |
|            | Sample Size (male)   | Age Mean (SD)                                                                      | Sample Size (Male) |  |            |         |                 |                 |
| [39]       | 39(9)                | 68.6(6.5)                                                                          | 29(12)             |  | CS         | 3.0T GE | MNI             | ICA             |
| [77]       |                      | A-LLD: Sample size, 7, age, 69.9(4.9)<br>NA-LLD: 9, 68.3(6.1)<br>HC: 10, 68.6(7.0) |                    |  | CS         | 1.5T S  | MNI             | SB              |
| [215]      | 32(14)               | 68.3(6.5)                                                                          | 32(13)             |  | CS         | 3.0T GE | MNI             | ICA             |
| [216]      |                      | LLD: Sample size, 71(48); age, 71.0(6.6) compare baseline and after treatment      |                    |  | Cohort     | 3.0T S  | MNI             | SB              |

Abbreviations: A-LLD, apathetic LLD; ICA, Independent Component Analysis; CS, cross-sectional study; GE, General Electronics; MNI, Montreal Neurological Institute; NA-LLD, non-apathetic LLD; SB, seed-based analysis; SD, standard deviation; T, tesla.

**Supplementary Table S7.** Characteristics of main rs-fMRI studies associated with the salience network (SN) in Alzheimer’s disease (AD) and mild cognitive impairment (MCI) patients included in the review.

| References | Demographic Group: Sample Size, N (Male); Age, Mean (SD)                                                                                                                      | Study Type          | Scanner | Reference Space | Analysis Method |
|------------|-------------------------------------------------------------------------------------------------------------------------------------------------------------------------------|---------------------|---------|-----------------|-----------------|
| [166]      | Old: Sample size, 20(6); age, 73.9(8.2)<br>Young: Sample size, 20(6); age, 73.9(8.2)<br>AD: Sample size, 12(5); age, 63.3(7.7)                                                | Regression analysis | 1.5T S  | MNI             | ICA             |
| [170]      | bvFTD: Sample size, 12(6); age, 60.8(4.6)<br>HC: Sample size, 12(5); age, 62.0(8.2);<br>PiB-: Sample size, 26(14); age, 81.2(5.9)<br>PiB+: Sample size, 13(7); age, 83.8(8.0) | CS                  | 1.5T S  | MNI             | ICA             |
| [217]      | CN, Apo ε4 --: Sample size, 56(35); age, 79(N/A)<br>CN, Apo ε4+-: Sample size, 26(14); age, 78(N/A)<br>AD: Sample size, 35(17); age, 65.8(8.3)                                | CS                  | 3.0T P  | MNI             | SB              |
| [218]      | aMCI: Sample size, 18(10); age, 70.2(7.9)<br>HC, Y: Sample size, 75(38); age, 23.8(4.0)<br>HC, O: Sample size, 21(7); age, 65.0(8.2)                                          | CS                  | N/A     | MNI             | ICA/SB          |
| [219]      |                                                                                                                                                                               | CS                  | 3.0T S  | MNI             | ICA             |

a. Regression analysis within- and between-network FC are related to both global and regional Aβ deposition. Abbreviations: AD, Alzheimer’s disease; Apo, apolipoprotein; bvFTD, behavior variant Frontal Temporal Dementia; CN, cognitively normal; CS, cross-sectional study; ICA, Independent Component Analysis; aMCI, amnesic Mild cognitive impairment; MNI, Montreal Neurological Institute; O, old; P, Philips; PiB-, regional beta-amyloid load (the distribution volume ratio, DVR) <1.061; PiB+, regional beta-amyloid load (the distribution volume ratio, DVR) >1.061; S, Siemens; T, tesla; Y, young.
